## RESEARCH ARTICLE

# Public perception of the appropriateness of COVID-19 management strategies and level of disturbances in daily activities: A focus on educational level

Yeong Jun Ju<sup>1</sup> , Woorim Kim<sup>2</sup> , Soon Young Lee<sup>1\*</sup> 

**1** Department of Preventive Medicine and Public Health, Ajou University School of Medicine, Suwon-si, Gyeonggi-do, Republic of Korea, **2** Division of Cancer Control & Policy, National Cancer Control Institute, National Cancer Center, Goyang-si, Gyeonggi-do, Republic of Korea

 These authors contributed equally to this work.

\* [solee@ajou.ac.kr](mailto:solee@ajou.ac.kr)

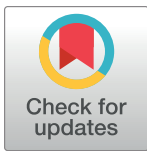

## Abstract

### OPEN ACCESS

**Citation:** Ju YJ, Kim W, Lee SY (2023) Public perception of the appropriateness of COVID-19 management strategies and level of disturbances in daily activities: A focus on educational level. PLoS ONE 18(6): e0287143. <https://doi.org/10.1371/journal.pone.0287143>

**Editor:** Jordi Gumà, Centre for Demographic Studies, SPAIN

**Received:** January 26, 2023

**Accepted:** May 31, 2023

**Published:** June 9, 2023

**Copyright:** © 2023 Ju et al. This is an open access article distributed under the terms of the [Creative Commons Attribution License](https://creativecommons.org/licenses/by/4.0/), which permits unrestricted use, distribution, and reproduction in any medium, provided the original author and source are credited.

**Data Availability Statement:** Data will be made available on request. The dataset is available on the Korea Community Health Survey website (<https://chs.cdc.go.kr/chs/rdr/rdrInfoProcessMain.do>).

**Funding:** Ju, YJ - This work was supported by the National Research Foundation of Korea(NRF) grant funded by the Korea government (Ministry of Science and ICT) (No. NRF-2022R1C1C2003977). - NO : The funders had no role in study design, data collection and analysis, decision to publish, or preparation for the manuscript.

## Background

This study investigated the association between public perception of the appropriateness of management strategies implemented during the COVID-19 pandemic and the level of disturbances in daily activities reported by the general population.

## Methods

This cross-sectional study used Korea Community Health Survey conducted from August to November 2020. Public perception of COVID-19 management strategies included those implemented by the government (central, city or provincial, and administrative districts), the mass media, regional medical institutions, and neighbors. The subjective level of disturbances in daily activities was measured using a 0–100 numeric rating scale developed by Korea Disease Control and Prevention Agency. Multivariable linear regression analysis was used. A subgroup analysis was conducted based on education level.

## Results

The present study analyzed 211,353 participants. Compared to individuals who perceived that the management strategies implemented during the pandemic was 'highly appropriate,' those who reported 'mediocre appropriateness' ( $\beta$ : -1.96, p-value: <0.001) or 'low appropriateness' ( $\beta$ : -3.60, p-value: 0.010) reported higher levels of subjective disturbances. The appropriateness of measures implemented by the mass media was associated with levels of subjective disturbances felt by individuals of lower education with statistical significance, whereas that applied by the mass media and the government were important in those with higher education.

**Competing interests:** The authors have declared that no competing interests exist.

## Conclusions

The findings suggest the importance of public perception of management strategies when implementing containment policies and minimizing its disturbances on daily lives is essential.

## Introduction

The coronavirus disease 2019 (COVID-19) was declared a pandemic by the World Health Organization (WHO) in 2020 [1]. The number of infected individuals and related mortality has been increasing due to its rapid rate of transmission worldwide [2]. Naturally, the pandemic has widely affected the lives of numerous individuals, in which its direct impact includes the lowering of psychological well-being and quality of life [3]. The outbreak has also exerted many indirect effects, due to social distancing and quarantine measures implemented by the government to confine and manage cases [4]. The government of South Korea also implemented a “distancing in daily life” initiative along with rapid testing and isolation strategies to respond to the outbreak [4, 5].

Although social distancing is an effective strategy to reduce the spread of COVID-19, such measures have led to difficulties in physically contacting close contacts, an increase in working from home, and a rise in uncertainty about future employment and income due to job loss [3]. Furthermore, these circumstances, including the closing of schools and shops, the ban of public events, and the promotion of working from home, have inevitably affected the daily activities of several individuals in many different aspects [6]. For instance, changes in economic activity, work, sleep, physical activity, and socialization have been reported [7]. Routinized behaviors are known to provide a sense of purpose and meaning in life, which is the essence of wellbeing [8]. As such, alterations in daily life patterns can exert a negative influence on wellbeing and increase psychological problems, such as depression, anxiety, and emotional fatigue [9]. Impact on social life may also negatively affect subjective wellbeing and life satisfaction [10]. At the same time, the pandemic may have also exerted some positive effects, such as increased utilization of the internet and work flexibility [11, 12]. Considering the impact of COVID-19 on the daily lives of individuals, a need exists to investigate the associated factors.

Many aspects of a pandemic are mediated, explained, or experienced through governmental institutions and mass media, which implies that public perception of these institutions is involved with how individuals interact with a crisis [13]. Previous literature has reported the potential impact of public perception or trust during the COVID-19 outbreak on the life of individuals. A study in Germany revealed that individuals with a low level of trust in government institutions or the media pre-crisis report a larger decrease of life satisfaction [14]. Trust in COVID-19 related regulations implemented by governmental and social institutions was also related to overall frustration in university students [15]. Also, as dissemination of reliable information in a timely manner is essential to motivate the public to conform with restrictive measures during times of crisis, securing channels of communication between the government and society have been found important during the pandemic [16].

As literature suggest, public perception of the appropriateness of management strategies implemented during a pandemic may be related to the subjective level of disturbances sensed by an individual. Public trust may be associated with the level of daily life disruptions during a crisis by affecting individuals’ willingness to adapt and conform to public policy interventions [17]. Adherence to government guidelines during a pandemic is also dependent on trust in the government and its institutions, which implicates its importance in terms of societal response [18]. Perception of the mass media is also an influential factor because it allows fast and

extensive reach regarding public health communication while also providing social connectedness [19]. Disturbances in social relationships and medical services during a pandemic are impacted by communication as it delivers information from both authorities and informal social networks [20, 21].

Despite its potential importance, studies on the association between public perception of the appropriateness of COVID-19 management strategies and the level of disturbances in daily activities reported during the outbreak in Korea are deficient. Hence, this study aimed to investigate whether individuals who perceived the implemented COVID-19 management strategies as being positive report lower levels of disturbances in daily activities. Analysis was also conducted by how the public perceived the appropriateness of each type of COVID-19 measure, which included that implemented by central government, the city or provincial government, the administrative district government, the mass media, regional medical institutions, and neighbors and coworkers. This was because measures were implemented or distributed at different levels during the outbreak. Subgroup analysis was conducted based on education level because education is a well-known constituent of socioeconomic status and different socioeconomic groups are known to respond differently to life satisfaction [22]. Education also has an effect on institutional trust, with the relationship often being positive in cleaner countries and negative in corrupt societies [23]. As such, this study additionally explored how education level interplays in the stated relationship as different educational groups are likely to exhibit different patterns. The hypothesis was that public perception of the coping strategies implemented during the pandemic as being appropriate will be associated with lower levels of disturbances in daily activities reported, particularly in individuals with higher levels of education.

## Materials and methods

### Data and study population

This study used raw data from the 2020 Korea Community Health Survey (KCHS) conducted by the Korea Centers for Disease Control and Prevention Agency (KDCA). The KCHS is a cross-sectional survey, with a study population drawn from multistage, stratified area probability samples of civilian, non-institutionalized Korean households categorized according to geographic area, age, and sex. The survey is conducted annually and collects data through in-person (one-on-one) interviews. As the population sample is extracted from national survey data, it is considered representative of the Korean population [24].

This study included individuals aged  $\geq 19$  years. From an initial total of 229,269 potential participants, those with missing data on the relevant variables were excluded. This left a total of 211,353 participants eligible for inclusion in the present study (S1 Fig).

### Outcome variable

The outcome variable of this study was the subjective level of disturbances in daily activities reported by the study participants. This variable was measured using a 0–100 numeric rating scale developed by the KDCA to measure the impact of the COVID-19 in Korea and report the results as national statistics. This variable was measured based on the following question: “Assuming that a score of 100 implies that your daily life is the same as before the COVID-19 outbreak whereas a score of 0 implies a complete level of disturbance, what is your current status?” Participants could respond on a ten-point unit. A lower score implies a higher level of disturbance. The subjective level of disturbances in daily activities was successfully evaluated using this question in a previous study [25].

## Independent variables

The main variable of this study was public perception of the appropriateness of management strategies during the COVID-19 pandemic, measured using the question: “Do you think that the government or the following institutions have implemented appropriate COVID-19 coping strategies?” The question was inquired for the central government (including the Ministry of Health and Welfare and KCDA), the city or provincial government, the administrative district government, the mass media, regional medical institutions, and neighbors and coworkers. Available responses were “very appropriate,” “appropriate,” “mediocre,” “inappropriate,” and “very inappropriate.” Individuals who responded that the coping strategies were appropriate were classified into the “yes” category and vice versa. The questions were inquired separately and in composite. In the composite analysis, the responses for the different types of measures inquired were summed up and categorized into “Appropriate” (5 to 6), “Mediocre” (3 to 4), and “Not appropriate” (0 to 2) groups to measure how positively individuals perceived COVID-19 management strategies in whole.

Various demographic, socioeconomic, and health-related variables were included as covariates for the analysis. They were sex (male or female), age (19–29, 30–39, 40–49, 50–59, 60–69, or 70+ years), education level (uneducated, elementary school, middle school, high school, or college and above), income (quartiles), job classification (professional or administrative position, office work, sales and service, agriculture and fishery, blue-collar work or simple labor, or unemployed), household composition (one-, two-, or three-generation household), area of residence (urban or rural), monthly drinking status (yes or no), smoking status (yes or no), depressive symptoms (yes or no), perceived stress (yes or no), and subjective health status (poor or fair).

## Statistical analysis

The general characteristics of the study population were examined by t-test, and analysis of variance was used to compare the means and standard deviations in subjective level of disturbances in daily activities by characteristics. Additionally, Cohen’s *d*, an effect-size measure, was calculated (S1 Table). Multivariable linear regression analysis was used to examine the association between public perception of implemented COVID-19 management strategies and subjective levels of disturbances in daily activities. Analyses were also performed separately by the six different kinds of management strategies. Subgroup analysis was conducted based on education level. All p-values were considered two-sided and significant at  $p < 0.05$ . All analyses were conducted using the SAS software, version 9.4 (SAS Institute, Cary, NC, USA).

## Results

The general characteristics of 211,353 study population are shown in Table 1. About 61.6% of the study population perceived the implemented COVID-19 management strategies as being “appropriate” (5 to 6), 16.1% as “mediocre” (3 to 4), and 22.3% as “not appropriate” (0 to 2). The mean level of disturbances in daily activities reported by the participants was  $55.33 \pm 22.96$ . Increased scores, inferring low levels of disturbances in daily activities, were found in individuals who viewed the introduced coping strategies as being appropriate.

The results of the regression analysis on the association between levels of disturbances in daily activities and perceived appropriateness of COVID-19 management strategies are presented in Table 2. Compared to individuals who viewed the strategies as being “appropriate”, those who perceived them as being “mediocre” ( $\beta -1.96$ ,  $p$ -value  $< 0.001$ ) or “not appropriate” ( $\beta -3.60$ ,  $p$ -value 0.010) showed increased levels of disturbances in daily activities.

Table 1. General characteristics of subjects.

| Variables                                         | Total   |      | Level of disturbances in daily activities* | P-Value |
|---------------------------------------------------|---------|------|--------------------------------------------|---------|
|                                                   | N       | %    |                                            |         |
| <b>Public perception of management strategies</b> |         |      |                                            |         |
| Not appropriate (0~2)                             | 47,177  | 22.3 | 51.68 ± 23.64                              | < .001  |
| Mediocre (3~4)                                    | 34,087  | 16.1 | 53.46 ± 22.81                              |         |
| Appropriate (5~6)                                 | 130,089 | 61.6 | 57.14 ± 22.55                              |         |
| <b>Sex</b>                                        |         |      |                                            |         |
| Male                                              | 95,868  | 45.4 | 56.69 ± 22.63                              | < .001  |
| Female                                            | 115,485 | 54.6 | 54.19 ± 23.18                              |         |
| <b>Age</b>                                        |         |      |                                            |         |
| 19~29                                             | 24,297  | 11.5 | 53.13 ± 21.52                              | < .001  |
| 30~39                                             | 23,611  | 11.2 | 50.78 ± 22.01                              |         |
| 40~49                                             | 33,400  | 15.8 | 53.03 ± 21.39                              |         |
| 50~59                                             | 40,942  | 19.4 | 54.52 ± 22.46                              |         |
| 60~69                                             | 41,434  | 19.6 | 55.69 ± 23.61                              |         |
| 70+                                               | 47,669  | 22.6 | 60.69 ± 24.04                              |         |
| <b>Educational level</b>                          |         |      |                                            |         |
| Uneducated                                        | 18,579  | 8.8  | 62.65 ± 24.34                              | < .001  |
| Elementary school                                 | 30,602  | 14.5 | 58.53 ± 24.14                              |         |
| Middle school                                     | 23,038  | 10.9 | 55.95 ± 23.68                              |         |
| High school                                       | 72,159  | 34.1 | 53.98 ± 22.59                              |         |
| College and above                                 | 66,975  | 31.7 | 53.07 ± 21.54                              |         |
| <b>Income</b>                                     |         |      |                                            |         |
| Q1 (Low)                                          | 52,175  | 24.7 | 58.61 ± 24.90                              | < .001  |
| Q2                                                | 47,883  | 22.7 | 55.09 ± 23.33                              |         |
| Q3                                                | 52,184  | 24.7 | 53.99 ± 22.08                              |         |
| Q4 (High)                                         | 59,111  | 28.0 | 53.80 ± 21.28                              |         |
| <b>Job classification</b>                         |         |      |                                            |         |
| Professional or administrative position           | 21,630  | 10.2 | 53.35 ± 21.25                              | < .001  |
| Office work                                       | 18,623  | 8.8  | 54.63 ± 20.33                              |         |
| Sales and service                                 | 27,028  | 12.8 | 51.99 ± 22.40                              |         |
| Agriculture and fishery                           | 20,897  | 9.9  | 60.79 ± 23.41                              |         |
| Blue collar work or simple labor                  | 39,964  | 18.9 | 56.58 ± 22.31                              |         |
| Unemployed                                        | 83,211  | 39.4 | 55.11 ± 24.01                              |         |
| <b>Household composition</b>                      |         |      |                                            |         |
| 1 generation                                      | 100,156 | 47.4 | 57.07 ± 23.72                              | < .001  |
| 2 generation                                      | 97,316  | 46.0 | 53.60 ± 22.09                              |         |
| 3 generation                                      | 13,881  | 6.6  | 54.83 ± 22.48                              |         |
| <b>Area of residence</b>                          |         |      |                                            |         |
| Rural                                             | 92,499  | 43.8 | 58.17 ± 23.59                              | < .001  |
| Urban                                             | 118,854 | 56.2 | 53.11 ± 22.21                              |         |
| <b>Monthly drinking status</b>                    |         |      |                                            |         |
| No                                                | 116,440 | 55.1 | 56.16 ± 23.54                              | < .001  |
| Yes                                               | 94,913  | 44.9 | 54.31 ± 22.19                              |         |
| <b>Smoking status</b>                             |         |      |                                            |         |
| No                                                | 177,505 | 84.0 | 55.34 ± 22.88                              | 0.510   |
| Yes                                               | 33,848  | 16.0 | 55.25 ± 23.39                              |         |
| <b>Depressive symptoms</b>                        |         |      |                                            |         |

(Continued)

Table 1. (Continued)

| Variables                       | Total   |       | Level of disturbances in daily activities* | P-Value |
|---------------------------------|---------|-------|--------------------------------------------|---------|
|                                 | N       | %     | Mean $\pm$ S.D                             |         |
| No (PHQ-9 < 10)                 | 205,539 | 97.3  | 55.47 $\pm$ 22.81                          | < .001  |
| Yes (PHQ-9 $\geq$ 10)           | 5,814   | 2.8   | 50.30 $\pm$ 27.18                          |         |
| <b>Perceived stress</b>         |         |       |                                            |         |
| No                              | 164,836 | 78.0  | 56.78 $\pm$ 22.56                          | < .001  |
| Yes                             | 46,517  | 22.0  | 50.19 $\pm$ 23.62                          |         |
| <b>Subjective health status</b> |         |       |                                            |         |
| Poor                            | 109,471 | 51.8  | 55.23 $\pm$ 23.22                          | 0.050   |
| Fair                            | 101,882 | 48.2  | 55.43 $\pm$ 22.68                          |         |
| <b>Total</b>                    | 211,353 | 100.0 | 55.33 $\pm$ 22.96                          |         |

\* Lower score implies higher levels of disturbances

<https://doi.org/10.1371/journal.pone.0287143.t001>

Apart from public perception of management strategies, Table 2 additionally reveal other factors associated with the level of disturbances in daily activities experienced by individuals. Specifically, females and those aged between 20 to 49 years tended to report higher levels of disturbances, whereas the elderly aged 70 years or above showed a reverse relationship. Individuals with a higher education also reported increased levels of disturbances, in addition to those residing in urban areas or belonging to households composed of three generations. Regarding occupation, higher levels of disturbances were shown in those in sales and service workers or the unemployed than those in professional or administrative positions, but a reversed association was found in those in office work or agriculture and fishery. Individuals with depressive symptoms or perceived stress also showed escalated levels of disturbances.

The results of the analysis considering each type of COVID-19 measure separately are presented in Fig 1. A higher level of disturbances in daily activities was found in individuals who viewed those strategies implemented by the central government ( $\beta$  -1.06, p-value <0.001), the city or province ( $\beta$  -0.74, p-value = 0.004), the administrative district government ( $\beta$  -1.48, p-value <0.001), and the mass media ( $\beta$  -0.81, p-value <0.001) as being inappropriate.

The results of the subgroup analysis are shown in Fig 2. The level of disturbances in daily activities was associated with public perception of the appropriateness COVID-19 management strategies related to the mass media in the “uneducated” ( $\beta$  -2.86, p-value 0.003) “elementary school” ( $\beta$  -1.36, p-value 0.031) groups. Statistical significance was found with that of the administrative government in the “elementary school” ( $\beta$  -2.15, p-value 0.007) and “middle school” ( $\beta$  -2.65, p-value 0.002) groups. The “high school” (central government:  $\beta$  -1.16, p-value 0.001; city or provincial government:  $\beta$  -1.31, p-value 0.002; administrative government:  $\beta$  -0.89, p-value 0.026; mass media:  $\beta$  -0.60, p-value 0.043) and “college and above” (central government:  $\beta$  -1.39, p-value <0.001; administrative government:  $\beta$  -1.55, p-value <0.001; mass media:  $\beta$  -1.03, p-value <0.001) groups generally showed a correlation between the level of disturbances in daily activity and public perception of strategies by the mass media and all levels of the government.

## Discussion

The findings of this study reveal that individuals who perceived that management strategies implemented during the COVID-19 outbreak as being appropriate reported lower levels of disturbances in daily activities. In other words, the higher the trust in institutions, indirectly

Table 2. Results of the multivariable linear regression analysis.

| Variables                                         | Level of disturbances in daily activities* |      |         |
|---------------------------------------------------|--------------------------------------------|------|---------|
|                                                   | Adjusted- $\beta$                          | S.E. | P-value |
| <b>Public perception of management strategies</b> |                                            |      |         |
| Appropriate (5~6)                                 | Ref.                                       |      |         |
| Mediocre (3~4)                                    | -1.96                                      | 0.18 | < .001  |
| Not appropriate (0~2)                             | -3.60                                      | 0.17 | 0.010   |
| <b>Sex</b>                                        |                                            |      |         |
| Male                                              | Ref.                                       |      |         |
| Female                                            | -3.65                                      | 0.15 | < .001  |
| <b>Age</b>                                        |                                            |      |         |
| 19~29                                             | Ref.                                       |      |         |
| 30~39                                             | -2.82                                      | 0.26 | < .001  |
| 40~49                                             | -1.40                                      | 0.23 | < .001  |
| 50~59                                             | -0.40                                      | 0.23 | 0.072   |
| 60~69                                             | -0.51                                      | 0.27 | 0.060   |
| 70+                                               | 2.17                                       | 0.32 | < .001  |
| <b>Education level</b>                            |                                            |      |         |
| Uneducated                                        | Ref.                                       |      |         |
| Elementary school                                 | -3.21                                      | 0.37 | < .001  |
| Middle school                                     | -4.45                                      | 0.41 | < .001  |
| High school                                       | -4.34                                      | 0.40 | < .001  |
| College and above                                 | -4.69                                      | 0.41 | < .001  |
| <b>Income</b>                                     |                                            |      |         |
| Q1 (Low)                                          | Ref.                                       |      |         |
| Q2                                                | -1.08                                      | 0.29 | < .001  |
| Q3                                                | -0.76                                      | 0.32 | 0.017   |
| Q4 (High)                                         | -0.40                                      | 0.33 | 0.229   |
| <b>Job classification</b>                         |                                            |      |         |
| Professional or administrative position           | Ref.                                       |      |         |
| Office work                                       | 1.31                                       | 0.25 | < .001  |
| Sales and service                                 | -1.79                                      | 0.27 | < .001  |
| Agriculture and fishery                           | 0.96                                       | 0.36 | 0.009   |
| Blue collar work or simple labor                  | 0.17                                       | 0.25 | 0.494   |
| Unemployed                                        | -2.60                                      | 0.24 | < .001  |
| <b>Household composition</b>                      |                                            |      |         |
| 1 generation                                      | Ref.                                       |      |         |
| 2 generation                                      | -0.32                                      | 0.18 | 0.078   |
| 3 generation                                      | -0.88                                      | 0.33 | 0.008   |
| <b>Area of residence</b>                          |                                            |      |         |
| Rural                                             | Ref.                                       |      |         |
| Urban                                             | -1.87                                      | 0.20 | < .001  |
| <b>Monthly drinking status</b>                    |                                            |      |         |
| No                                                | Ref.                                       |      |         |
| Yes                                               | -0.87                                      | 0.15 | < .001  |
| <b>Smoking status</b>                             |                                            |      |         |
| No                                                | Ref.                                       |      |         |
| Yes                                               | -0.26                                      | 0.20 | 0.193   |
| <b>Depressive symptoms</b>                        |                                            |      |         |

(Continued)

Table 2. (Continued)

| Variables                       | Level of disturbances in daily activities* |      |         |
|---------------------------------|--------------------------------------------|------|---------|
|                                 | Adjusted-β                                 | S.E. | P-value |
| No (PHQ-9 < 10)                 | Ref.                                       |      |         |
| Yes (PHQ-9 ≥ 10)                | -2.53                                      | 0.47 | < .001  |
| <b>Perceived stress</b>         |                                            |      |         |
| No                              | Ref.                                       |      |         |
| Yes                             | -4.99                                      | 0.17 | < .001  |
| <b>Subjective health status</b> |                                            |      |         |
| Poor                            | Ref.                                       |      |         |
| Fair                            | 0.87                                       | 0.14 | < .001  |

\* Lower score implies higher levels of disturbances

<https://doi.org/10.1371/journal.pone.0287143.t002>

measured based on appropriateness in this study, the smaller the disturbances individuals experienced due to the pandemic. Specifically, appropriateness of strategies introduced by the central government, the city or provincial government, the administrative district government, and the mass media were related with lower levels of disturbances reported by individuals. Interestingly, appropriateness of strategies by the mass media correlated with the reduced level of disturbances in daily activities in individuals with a relatively lower level of education,

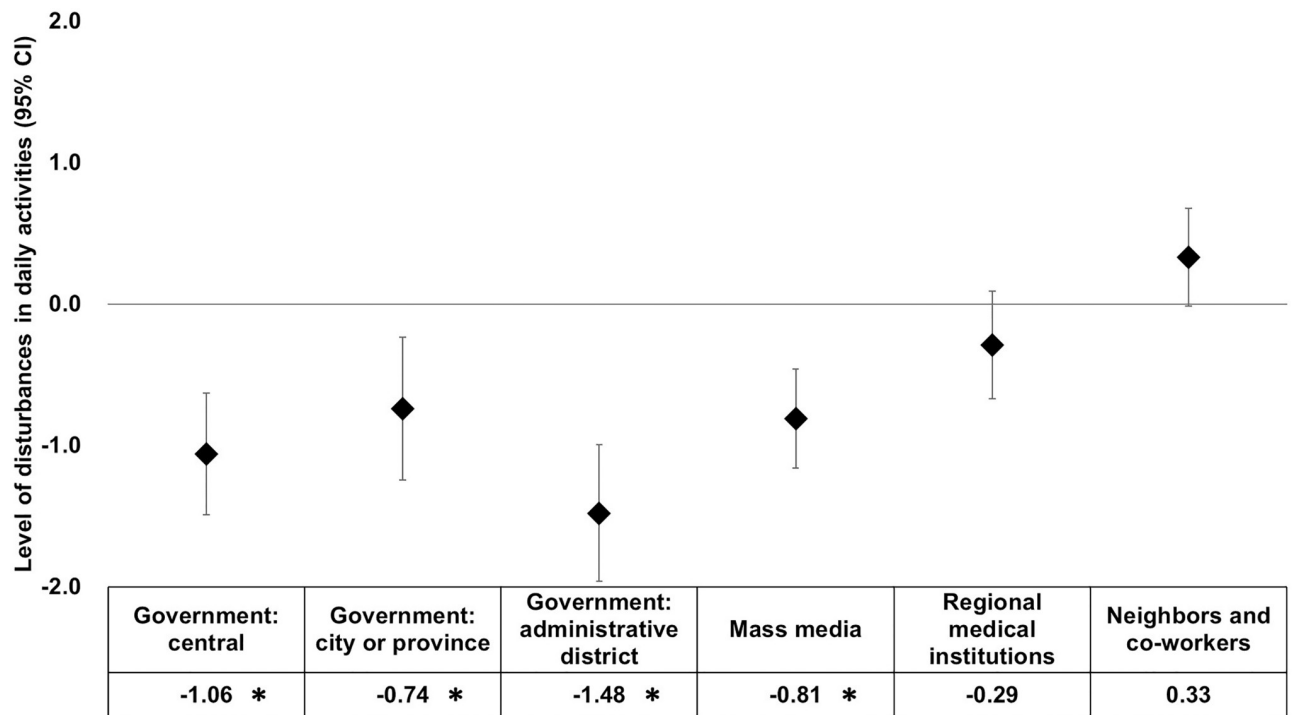

Note: Lower score implies higher levels of disturbances

Fig 1. Results of the multivariable linear regression analysis by public perception on the type of COVID-19 management strategies. \* Indicates a value of  $p < 0.05$ .

<https://doi.org/10.1371/journal.pone.0287143.g001>



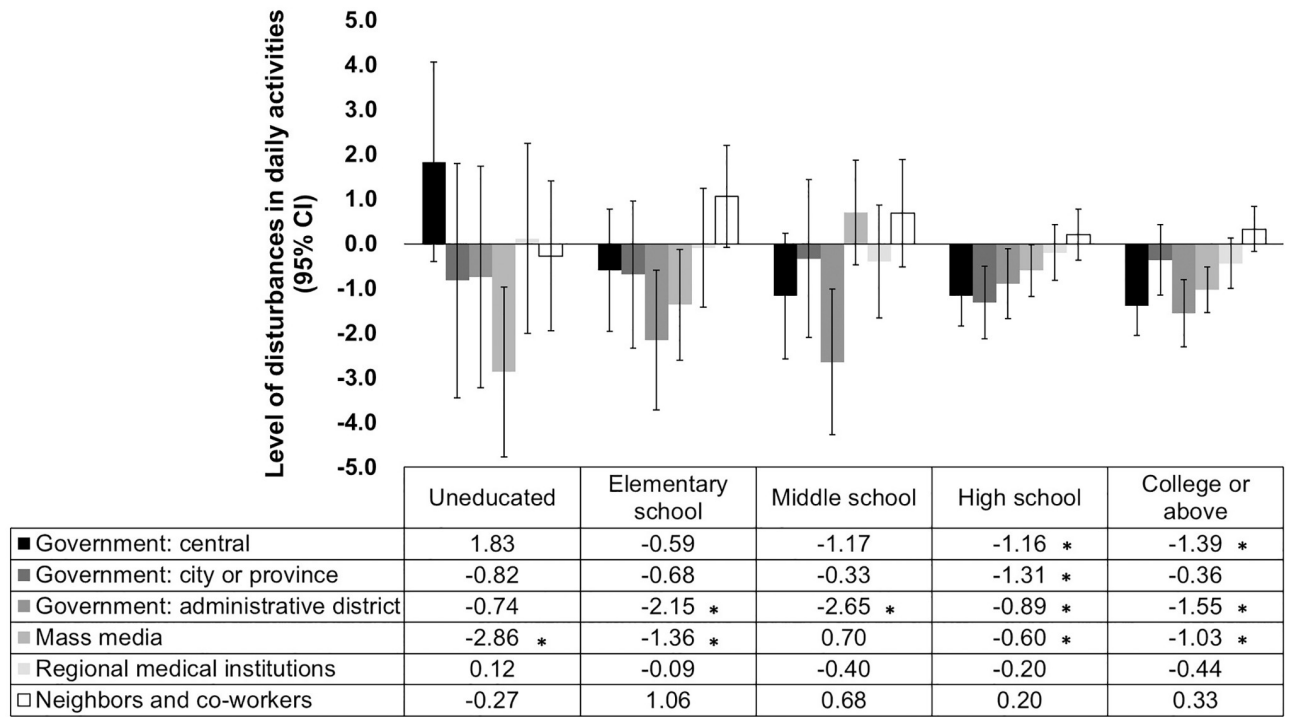

Note: Lower score implies higher levels of disturbances

**Fig 2. Results of subgroup analysis of the multivariable linear regression analysis of the association between public perception of COVID-19 management strategies and levels of disturbances in daily activities by education level.** \* Indicates a value of  $p < 0.05$ .

<https://doi.org/10.1371/journal.pone.0287143.g002>

whereas those by the mass media and all levels of the government were found to be related in those with higher education.

Effective implementation of management policies, including health recommendations, to control the COVID-19 pandemic necessitates compliance from the public [26]. The level of compliance can depend on how individuals perceive the cost and benefits of complying with government policies since they are more likely to conform to recommendations that impose a low burden or do not interfere with their daily activities [18]. Although some changes in daily life due to the COVID-19 outbreak may be positive, such as increased family time, better work flexibility, and calmer life, many negative effects have been reported [12, 27, 28]. Specifically, social distancing measures can cause notable disturbances in daily habits, attributed to various changes in work and education related activities [9]. Quarantine measures are also known to provoke various adverse effects, including distress, anxiety, loneliness, and reduced physical activity [29]. As such, perception of the appropriateness of management strategies can affect the level of subjective disturbances in daily activities, which in turn is important in achieving public compliance and effectively implementing strategies important in managing a pandemic [30].

The significant relationship found between public perception of the appropriateness of COVID-19 management strategies implemented by the government and the level of disturbances in daily activity offers important insights because studies have shown that life satisfaction itself may not have decreased noticeably despite various government measures imposed due to the pandemic. The experience may be subjective as political distrust have been found to be associated with pandemic distress, which implies that public perception, an indirect

measure of public trust, and its effect on the daily lives of individuals may be important in times of a public health crisis [31]. Transparent communication and provision of evidence-based explanation may also positively impact public perception of governmental policies [18]. Therefore, enhancing public trust may be essential to increase resilience in times of an ongoing pandemic where medical interventions may be of deficit, particularly because government trust can act as a measure of social capital [32].

The findings also reveal the potential role of mass media in causing disturbances in daily activities during an outbreak. Mass media is a major means for public health communication and acts as a source of information to the general public. The mass media serves as a platform to disseminate public health communications, provide education guidelines, and government policies implemented to combat a pandemic [19]. Mass media is also interrelated with public trust, indirectly reflected based on public perception in this study, of the government because it disseminates negative news that can not only reduce trust but also enhance political participation and increase public trust [33]. Considering the heavy reliance on mass media to disseminate public health information, the results highlight its importance in potentially lowering the level of disturbances felt or experienced by individuals during a pandemic [34].

In this study, participants who viewed that COVID-19 management measures delivered by the mass media were appropriate reported a lower level of disturbances. However, the level of disturbances in daily activities correlated with both public perception of strategies implemented by the media and the government only in individuals with higher education. This is in contrast with a previous study which concluded that the likelihood of having a positive opinion on COVID-19 response by the government was lower in those with higher education [35]. Hence, the tendencies found suggest a characteristic unique to the Korean society. Mass media may have a profound effect on the perception of daily life regardless of education level, possibly due to the need to accept new and up-to-date information during a public health crisis. The findings also infer the importance of providing accurate and unbiased social information because media coverage can affect public cognition, norms, and behaviors, and health-related beliefs [36].

This study has some limitations. First, causal inferences cannot be made assertively because this study was cross-sectional in design. Second, data were recorded annually and may not be collected at the peak of the pandemic as the Korean government declared different states of public health emergency starting from the COVID-19 outbreak. Third, although disturbances in daily activities that resulted due to the pandemic may have been positive, this could not be fully considered and reflected due to data limitation. Future studies on this topic considering the precise sense of changes perceived are needed. Last, information on public trust and interferences on daily activities related to the pandemic was based on self-reports. However, despite these limitations, this study is important because it is the first to analyze the association between public perception of the appropriateness of various COVID-19 management policies and reported levels of disturbances in daily activities using large, nationally representative data. The findings offer important insights in the development and implementation of COVID-19 related public health policies by revealing that in Korea, public perception of the appropriateness of pandemic measures were related to reported levels of daily disturbances and that such association may be important in enhancing compliance to public health measures during times of a pandemic.

In conclusion, public perception of the appropriateness of COVID-19 management policies were associated with subjective levels of daily disturbances. Specifically, public perception that measures delivered by the government and mass media were appropriate was associated with decreased levels of subjective disturbances in daily activities during the COVID-19 outbreak. The findings reveal the potential importance of public perception and minimizing its effect on the daily lives of individuals when implementing management policies during a pandemic.

## Supporting information

**S1 Fig. The study population selection process.**

(TIFF)

**S2 Fig. Histogram distributions of level of disturbances in daily activities.**

(TIFF)

**S3 Fig. Histogram distributions of number of public perception of management strategies.**

(TIFF)

**S1 Table. General characteristics and effect size by public perception of the type of COVID-19 management strategies.**

(DOCX)

## Author Contributions

**Conceptualization:** Yeong Jun Ju, Woorim Kim, Soon Young Lee.

**Data curation:** Yeong Jun Ju.

**Formal analysis:** Yeong Jun Ju.

**Funding acquisition:** Yeong Jun Ju.

**Investigation:** Yeong Jun Ju, Woorim Kim.

**Methodology:** Woorim Kim.

**Supervision:** Soon Young Lee.

**Validation:** Yeong Jun Ju, Woorim Kim.

**Visualization:** Yeong Jun Ju.

**Writing – original draft:** Woorim Kim.

**Writing – review & editing:** Woorim Kim.

## References

1. Cucinotta D, Vanelli M. WHO Declares COVID-19 a Pandemic. *Acta Biomed.* 2020; 91(1):157–60. Epub 20200319. <https://doi.org/10.23750/abm.v91i1.9397> PMID: 32191675.
2. Khademian F, Delavari S, Koohjani Z, Khademian Z. An investigation of depression, anxiety, and stress and its relating factors during COVID-19 pandemic in Iran. *BMC Public Health.* 2021; 21(1):275. Epub 20210203. <https://doi.org/10.1186/s12889-021-10329-3> PMID: 33535992.
3. Kim J, Park S, Subramanian SV, Kim T. The Psychological Costs of the COVID-19 Pandemic and Heterogeneous Effects in South Korea: Evidence from a Difference-in-Differences Analysis. *J Happiness Stud.* 2023; 24(2):455–76. Epub 20221130. <https://doi.org/10.1007/s10902-022-00605-3> PMID: 36471764.
4. Dighe A, Cattarino L, Cuomo-Dannenburg G, Skarp J, Imai N, Bhatia S, et al. Response to COVID-19 in South Korea and implications for lifting stringent interventions. *BMC Medicine.* 2020; 18(1):321. <https://doi.org/10.1186/s12916-020-01791-8> PMID: 33032601
5. Park IN, Yum HK. Stepwise Strategy of Social Distancing in Korea. *J Korean Med Sci.* 2020; 35(28):e264. Epub 20200720. <https://doi.org/10.3346/jkms.2020.35.e264> PMID: 32686376.
6. De Vos J. The effect of COVID-19 and subsequent social distancing on travel behavior. *Transportation Research Interdisciplinary Perspectives.* 2021; 5:100121.
7. Giuntella O, Hyde K, Saccardo S, Sadoff S. Lifestyle and mental health disruptions during COVID-19. *Proc Natl Acad Sci U S A.* 2021; 118(9). <https://doi.org/10.1073/pnas.2016632118> PMID: 33571107.
8. Heintzelman SJ, King LA. Routines and Meaning in Life. *Pers Soc Psychol Bull.* 2019; 45(5):688–99. Epub 20180918. <https://doi.org/10.1177/0146167218795133> PMID: 30226411.

9. Ares G, Bove I, Vidal L, Brunet G, Fuletti D, Arroyo A, et al. The experience of social distancing for families with children and adolescents during the coronavirus (COVID-19) pandemic in Uruguay: Difficulties and opportunities. *Child Youth Serv Rev.* 2021; 121:105906. Epub 20201229. <https://doi.org/10.1016/j.chidyouth.2020.105906> PMID: 33390638.
10. Ohlbrecht H, Jellen J. Unequal tensions: the effects of the coronavirus pandemic in light of subjective health and social inequality dimensions in Germany. *European Societies.* 2020; 23(Sup1):S905–22.
11. Karunathilake K. Positive and negative impacts of COVID-19, an analysis with special reference to challenges on the supply chain in South Asian countries. *J Soc Econ Dev.* 2020; 23(Suppl 3):1–14. Epub 20200902. <https://doi.org/10.1007/s40847-020-00107-z> PMID: 34720468.
12. Cornell S, Nickel B, Cvejic E, Bonner C, McCaffery KJ, Ayre J, et al. Positive outcomes associated with the COVID-19 pandemic in Australia. *Health Promot J Austr.* 2022; 33(2):311–9. Epub 20210512. <https://doi.org/10.1002/hpja.494> PMID: 33864299.
13. Sibley CG, Greaves LM, Satherley N, Wilson MS, Overall NC, Lee CHJ, et al. Effects of the COVID-19 pandemic and nationwide lockdown on trust, attitudes toward government, and well-being. *Am Psychol.* 2020; 75(5):618–30. Epub 20200604. <https://doi.org/10.1037/amp0000662> PMID: 32496074.
14. Bittman F. How Trust Makes a Difference: The Impact of the First Wave of the COVID-19 Pandemic on Life Satisfaction in Germany. *Applied Research in Quality of Life.* 2022; 17:1389–405. <https://doi.org/10.1007/s11482-021-09956-0> PMID: 34367359
15. Ballmann J, Helmer S, Berg-Beckhoff G, Guldager J, Jervelund S, Busse H, et al. Is Lower Trust in COVID-19 Regulations Associated with Academic Frustration? A Comparison between Danish and German University Students. *Int J Environ Res Public Health.* 2022; 19(3):1748. <https://doi.org/10.3390/ijerph19031748> PMID: 35162771
16. Balakina J. COVID-19 pandemic in Germany: information campaign, media, society. *Balt Reg.* 2022; 14(3):83–101.
17. Saechang O, Yu J, Li Y. Public Trust and Policy Compliance during the COVID-19 Pandemic: The Role of Professional Trust. *Healthcare (Basel).* 2021; 9(2). Epub 20210202. <https://doi.org/10.3390/healthcare9020151> PMID: 33540762.
18. Pak A, McBryde E, Adegbeye O. Does High Public Trust Amplify Compliance with Stringent COVID-19 Government Health Guidelines? A Multi-country Analysis Using Data from 102,627 Individuals. *Risk Management and Healthcare Policy.* 2020; 14:293–302.
19. Anwar A, Malik M, Raees V, Anwar A. Role of Mass Media and Public Health Communications in the COVID-19 Pandemic. *Cureus.* 2020; 12(9):e10453. Epub 20200914. <https://doi.org/10.7759/cureus.10453> PMID: 33072461.
20. Whetten K, Leserman J, Whetten R, Ostermann J, Thielman N, Swartz M, et al. Exploring lack of trust in care providers and the government as a barrier to health service use. *Am J Public Health.* 2006; 96(4):716–21. Epub 2006/03/02. <https://doi.org/10.2105/AJPH.2005.063255> PMID: 16507725.
21. Gottlieb M, Dyer S. Information and Disinformation: Social Media in the COVID-19 Crisis. *Acad Emerg Med.* 2020; 27(7):640–1. Epub 20200624. <https://doi.org/10.1111/acem.14036> PMID: 32474977.
22. Ren Z, Yue G, Xiao W, Fan Q. The Influence of Subjective Socioeconomic Status on Life Satisfaction: The Chain Mediating Role of Social Equity and Social Trust. *Int J Environ Res Public Health.* 2022; 19(23). Epub 20221125. <https://doi.org/10.3390/ijerph192315652> PMID: 36497727.
23. Hakhverdian A, Mayne Q. Institutional trust, education, and corruption: A micro–macro interactive approach. *The Journal of Politics.* 2012; 74(3):739–50.
24. Kang YW, Ko YS, Kim YJ, Sung KM, Kim HJ, Choi HY, et al. Korea community health survey data profiles. Osong public health and research perspectives. 2015; 6(3):211–7. <https://doi.org/10.1016/j.phrp.2015.05.003> PMID: 26430619
25. Kim W, Ju YJ, Lee SY. Does having various types of fear related to the COVID-19 disrupt the daily life of individuals? *Epidemiology and Health.* 2022:e2022004.
26. Han Q, Zheng B, Cristea M, Agostini M, Bélanger J, Gützkow B, et al. Trust in government regarding COVID-19 and its associations with preventive health behaviour and prosocial behaviour during the pandemic: a cross-sectional and longitudinal study. *Psychol Med.* 2021; Mar 26(1–11). <https://doi.org/10.1017/S0033291721001306> PMID: 33769242
27. Lossio-Ventura J, Lee A, Hancock J, Linos N, Linos E. Identifying Silver Linings During the Pandemic Through Natural Language Processing. *Front Psychol.* 2021; 12:712111. <https://doi.org/10.3389/fpsyg.2021.712111> PMID: 34539512
28. Li JB, Dou K, Liu ZH. Profiles of positive changes in life outcomes over the COVID-19 pandemic in Chinese adolescents: the role of resilience and mental health consequence. *Child Adolesc Psychiatry Ment Health.* 2022; 16(1):13. Epub 20220222. <https://doi.org/10.1186/s13034-022-00451-4> PMID: 35193652.

29. Lee H, Chu H. The effects of changes in daily life due to the COVID-19 pandemic on the depressive symptoms among community-dwelling older adults in Korea. *Int J Ment Health Nurs*. 2022; 31(4):974–84. <https://doi.org/10.1111/inm.13008> PMID: 35416403
30. Habersaat KB, Betsch C, Danchin M, Sunstein CR, Bohm R, Falk A, et al. Ten considerations for effectively managing the COVID-19 transition. *Nat Hum Behav*. 2020; 4(7):677–87. Epub 20200624. <https://doi.org/10.1038/s41562-020-0906-x> PMID: 32581299.
31. Kim H. Psychological Distress and Political Distrust during a Global Health Crisis: Evidence from a Cross-National Survey. *Political Studies Review*. 2022; Accpeted/ In press.
32. Zhou T, Nguyen TT, Zhong J, Liu J. A COVID-19 descriptive study of life after lockdown in Wuhan, China. *R Soc Open Sci*. 2020; 7(9):200705. Epub 20200930. <https://doi.org/10.1098/rsos.200705> PMID: 33047032.
33. Gozgor G. Global Evidence on the Determinants of Public Trust in Governments during the COVID-19. *Appl Res Qual Life*. 2021:1–20. Epub 2021/02/11. <https://doi.org/10.1007/s11482-020-09902-6> PMID: 33564341.
34. Ferreira G, Borges S. Media and Misinformation in Times of COVID-19: How People Informed Themselves in the Days Following the Portuguese Declaration of the State of Emergency. *Journalism and Media*. 2020; 1:108–21.
35. Enria L, Waterlow N, Rogers NT, Brindle H, Lal S, Eggo RM, et al. Trust and transparency in times of crisis: Results from an online survey during the first wave (April 2020) of the COVID-19 epidemic in the UK. *PLoS One*. 2021; 16(2):e0239247. Epub 20210216. <https://doi.org/10.1371/journal.pone.0239247> PMID: 33591985.
36. Dhanani LY, Franz B. The Role of News Consumption and Trust in Public Health Leadership in Shaping COVID-19 Knowledge and Prejudice. *Front Psychol*. 2020; 11:560828. Epub 20201022. <https://doi.org/10.3389/fpsyg.2020.560828> PMID: 33192827.
